# Supplementary material for: Design and application of a fluorogenic receptor for selective sensing of cations, small neutral molecules, and anions
Source: Royal Society of Chemistry journal article supplement (doi:10.1039/c8nj03998d), 2018-01-01
Supplement: c8nj03998d1.pdf [file c8nj03998d1.pdf]

## ***Electronic Supplementary Information***

### **Design and application of a fluorogenic receptor for selective sensing of cations, small neutral molecules, and anions†**

Navnita Kumar# and Sanjay K. Mandal\*

\*Department of Chemical Sciences, Indian Institute of Science Education and Research Mohali, Sector 81, Manauli PO, S.A.S. Nagar, Mohali, Punjab 140306, India

#Current Address: Department of Chemistry and Biochemistry, UCLA, 607 Charles E. Young Drive East Box 951569, Los Angeles, CA 90095-1569

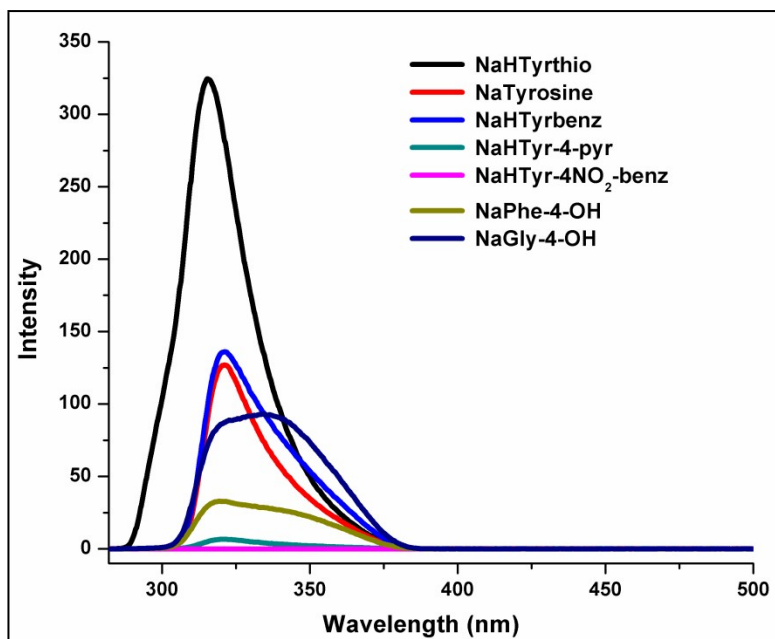

**Fig. S1** Comparison of photoluminescence ability of various amino acid based sensors using excitation wavelength = 270 nm.

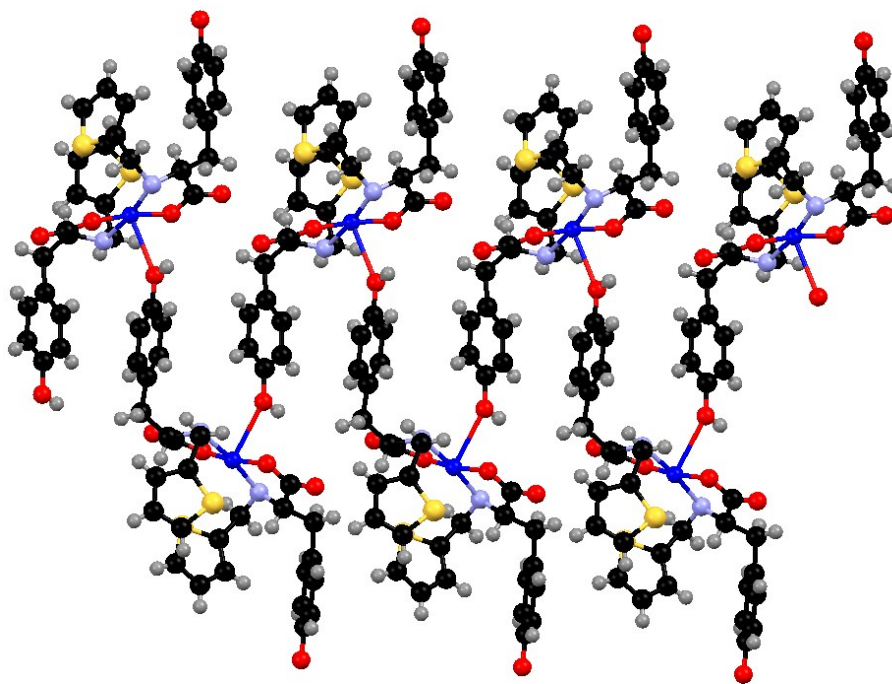

**Fig. S2** 1D coordination polymer of  $\{[\text{Cu}(\text{HTyrthio})_2]\text{H}_2\text{O}\}_n$  as reported in Reference 35.

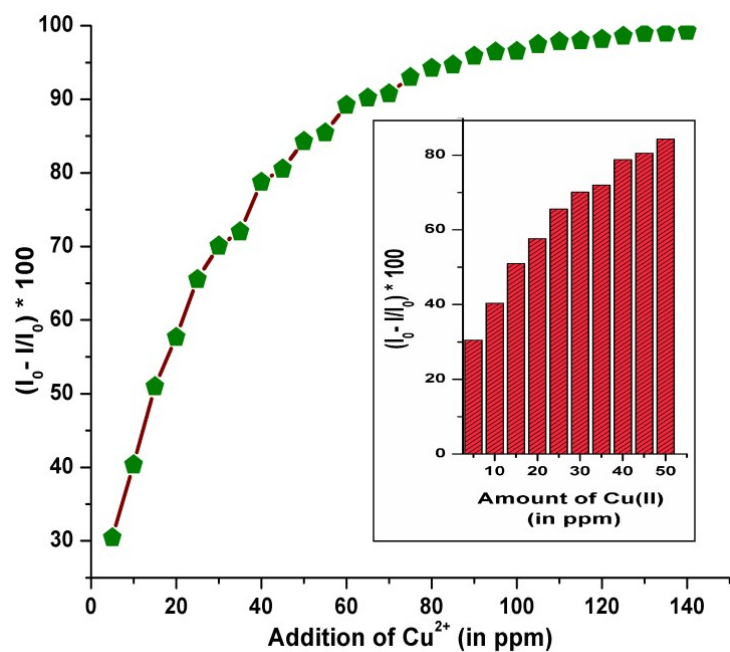

**Fig. S3** Quenching (%) in the fluorescence intensity of NaHTyrthio on addition of Cu(II) in ppm level.

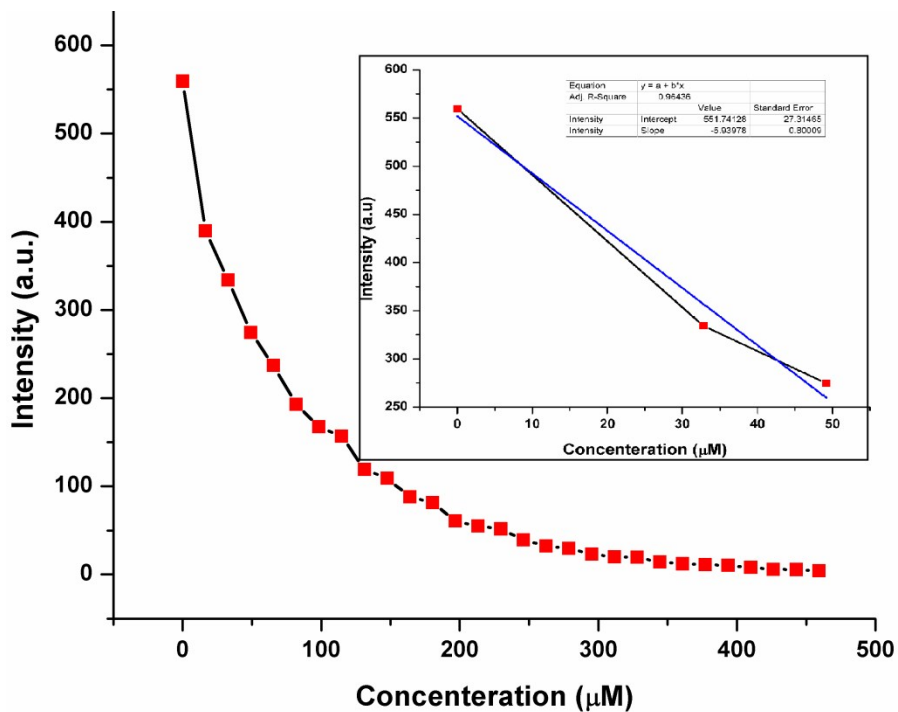

**Fig. S4** Plot of fluorescence intensity of NaHTyrthio vs increasing concentration of Cu<sup>2+</sup>, Inset: Negative slope (m) of graph was found to be 5.9398 ( $R^2 = 0.96435$ ).

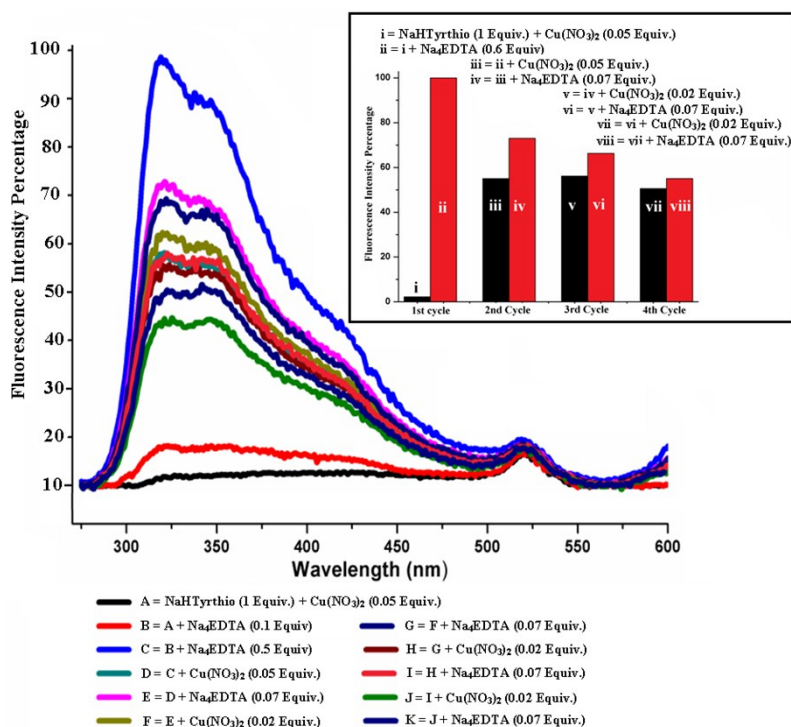

**Fig. S5** Emission spectra showing NaHTyrthio as an ON-OFF sensor for Cu(II). Inset: Quenching of fluorescence by Cu<sup>2+</sup> (black histogram) and redeeming the fluorescence by EDTA solution (red histogram) in subsequent cycles.

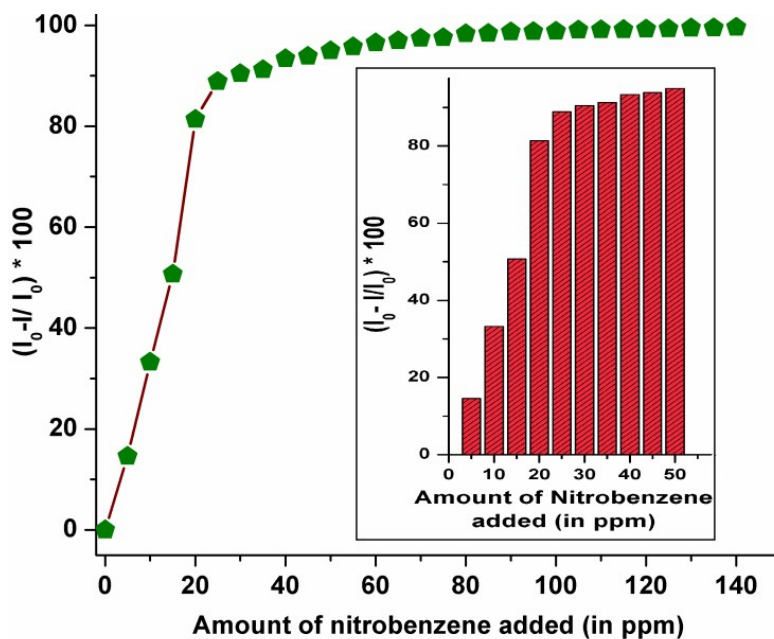

**Fig. S6** Quenching (%) in the fluorescence intensity of NaHTyrthio on addition of nitrobenzene in ppm level.

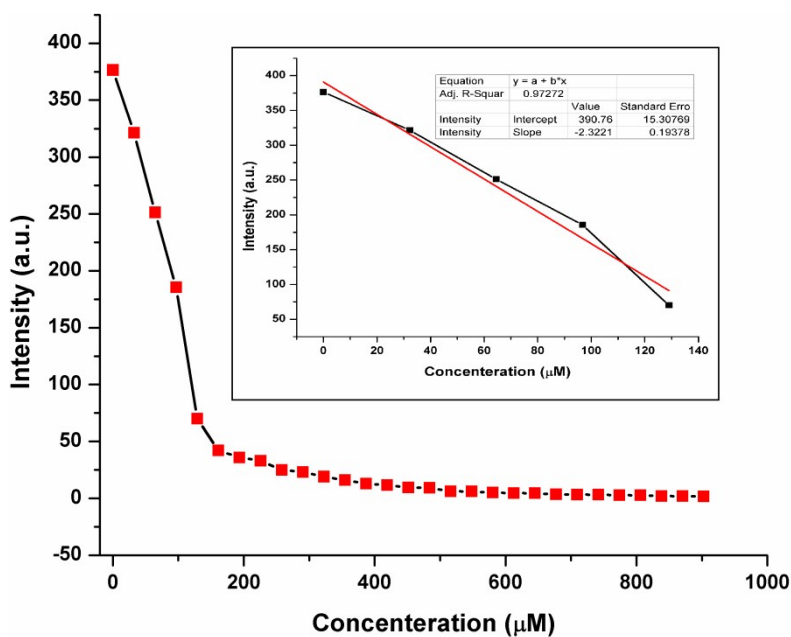

**Fig. S7** Fluorescence intensity of NaHTyrthio vs increasing concentration of nitrobenzene, Inset: Negative slope (m) of graph was found to be 2.3221 ( $R^2 = 0.97272$ ).

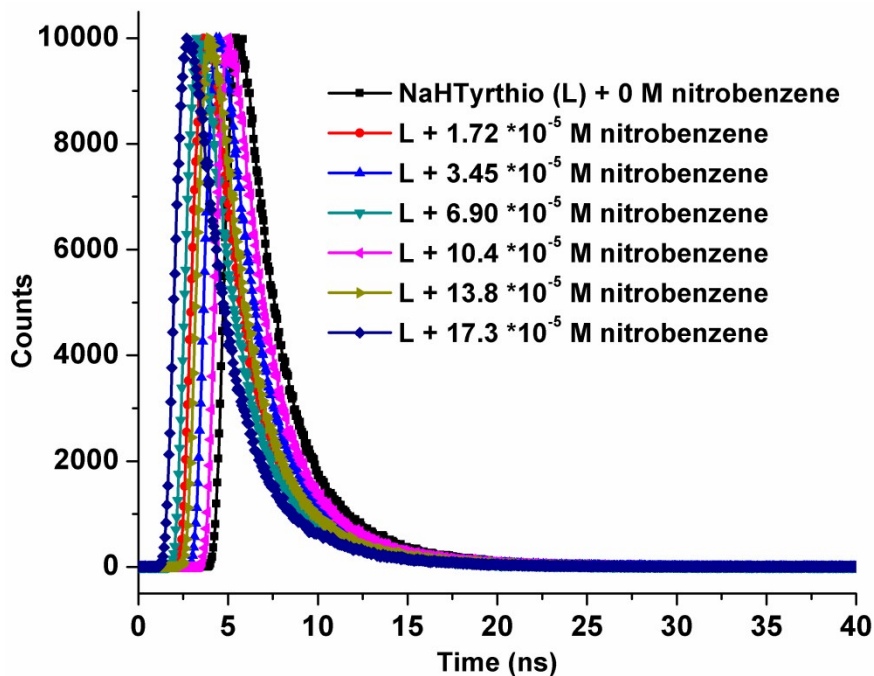

**Fig. S8** Lifetime decay profiles of NaHTyrthio (3 mL, 0.72 mM/methanol) in presence of various concentrations of nitrobenzene ( $\lambda_{exc} = 280$  nm, monitored at 315 nm).

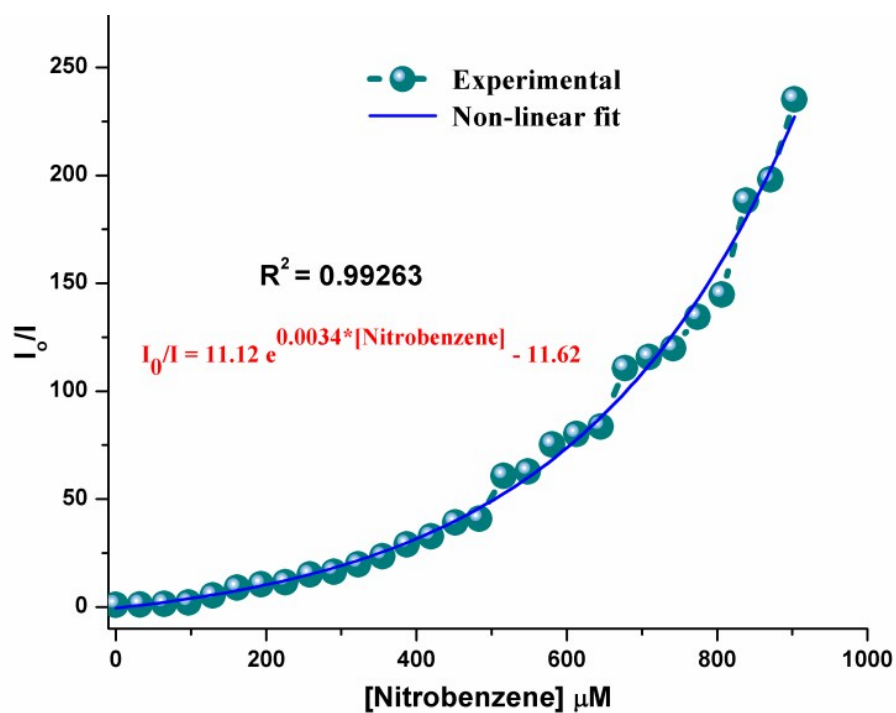

Fig. S9 Stern–Volmer plot  $I_0/I$  versus [Nitrobenzene] in methanol.

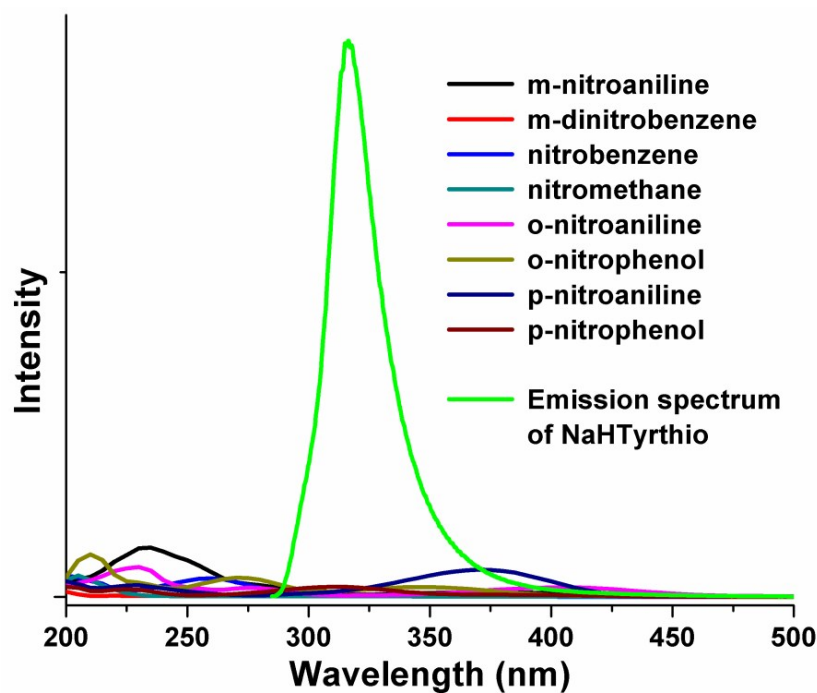

Fig. S10 Overlap between the absorption spectra of various analytes and the emission spectrum of NaHTyrthio in methanol.

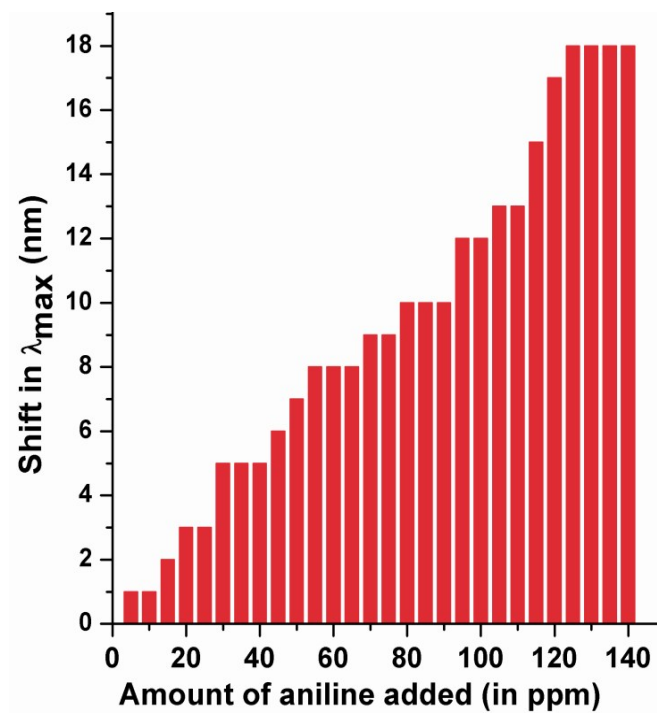

**Fig. S11** Shift in  $\lambda_{\text{emi}}$  of NaHTyrthio on addition of aniline in ppm level.

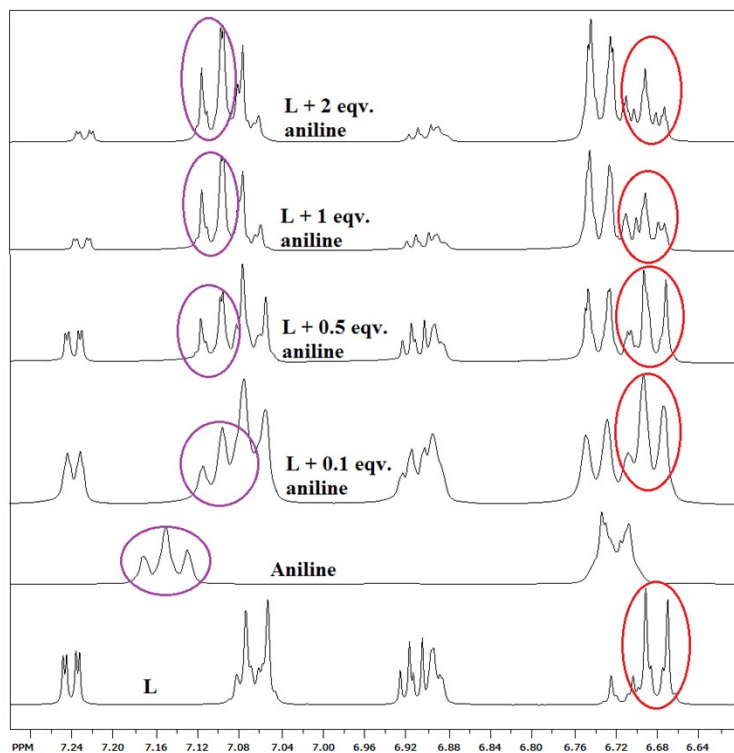

**Fig. S12**  $^1\text{H}$  NMR titrimetry of NaHTyrthio (L) with aniline as an analyte. (distortion in peaks of sensor (red) and analyte (violet)).

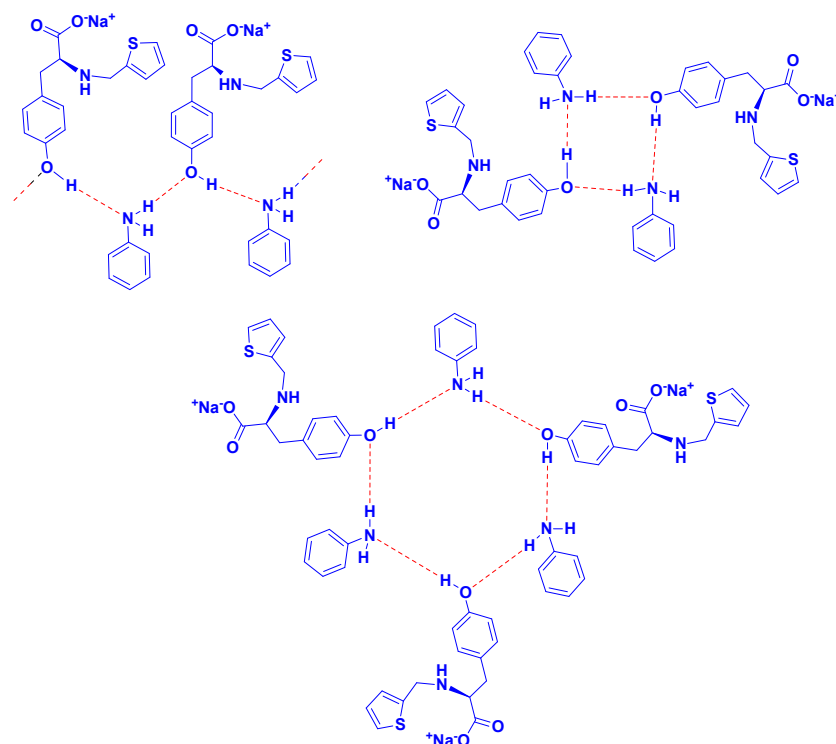

Fig. S13 Probable hydrogen bonding patterns between NaHTyrthio and aniline.

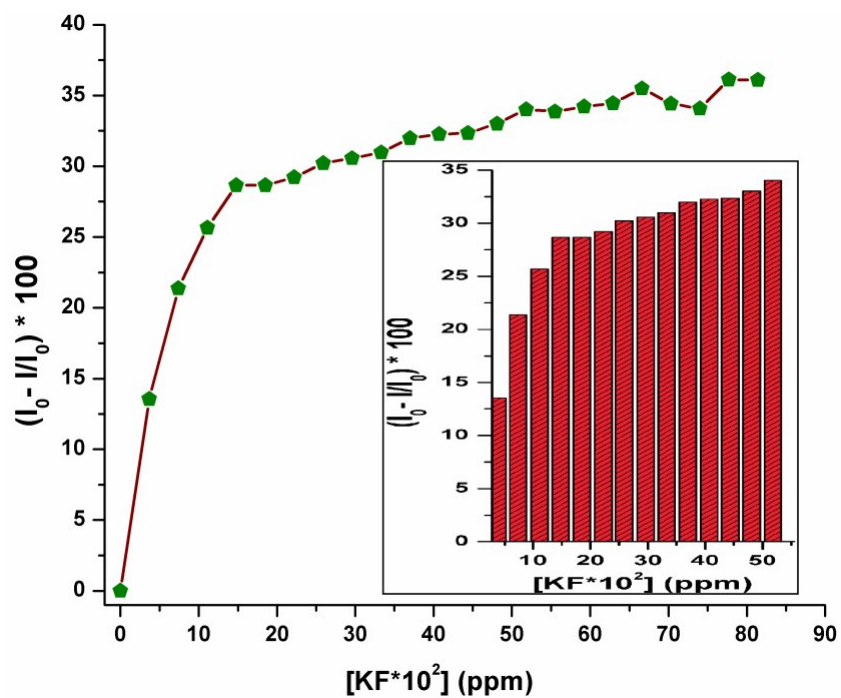

Fig. S14 Quenching (%) in the fluorescence intensity of NaHTyrthio on addition of KF in ppm level.



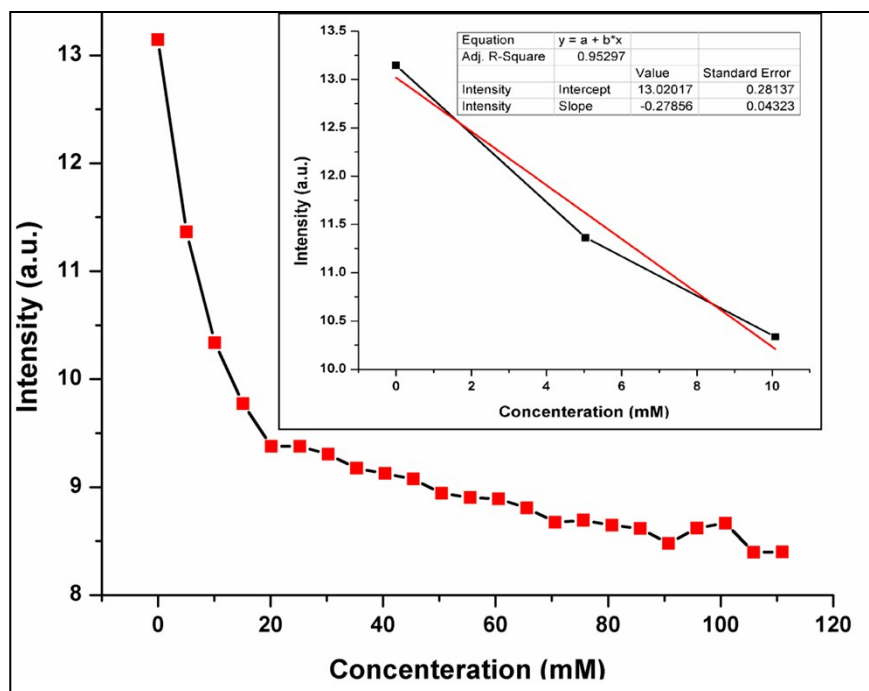

**Fig. S15** Fluorescence intensity of NaHTyrthio vs increasing concentration of KF (in methanol), Inset: Negative slope (m) of graph was found to be 0.27856 ( $R^2 = 0.95297$ ).

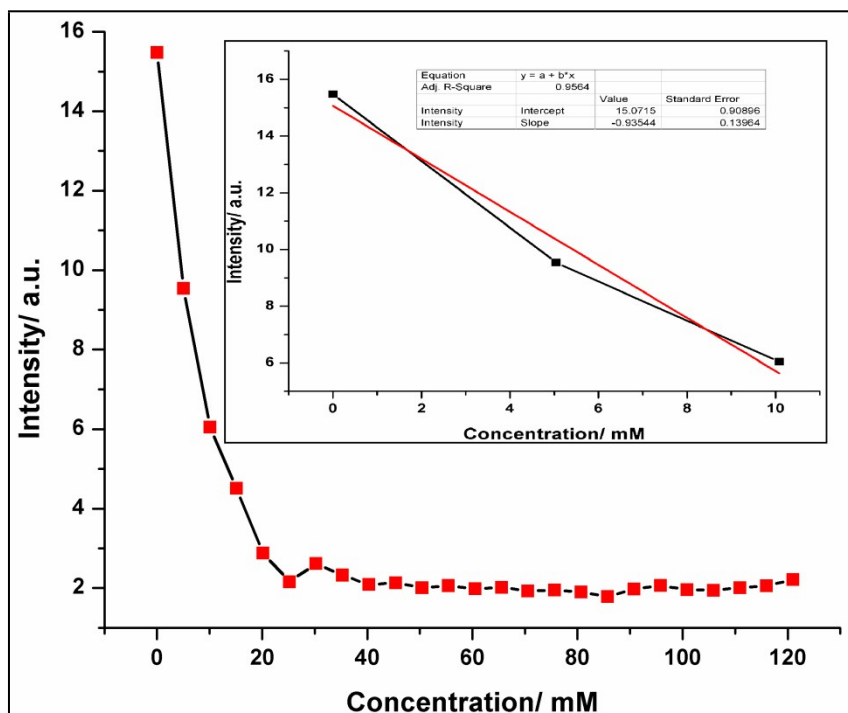

**Fig. S16** Fluorescence intensity of NaHTyrthio vs increasing concentration of NaF (in DMSO) Inset: Negative slope (m) of graph was found to be 0.93544 ( $R^2 = 0.9564$ ).

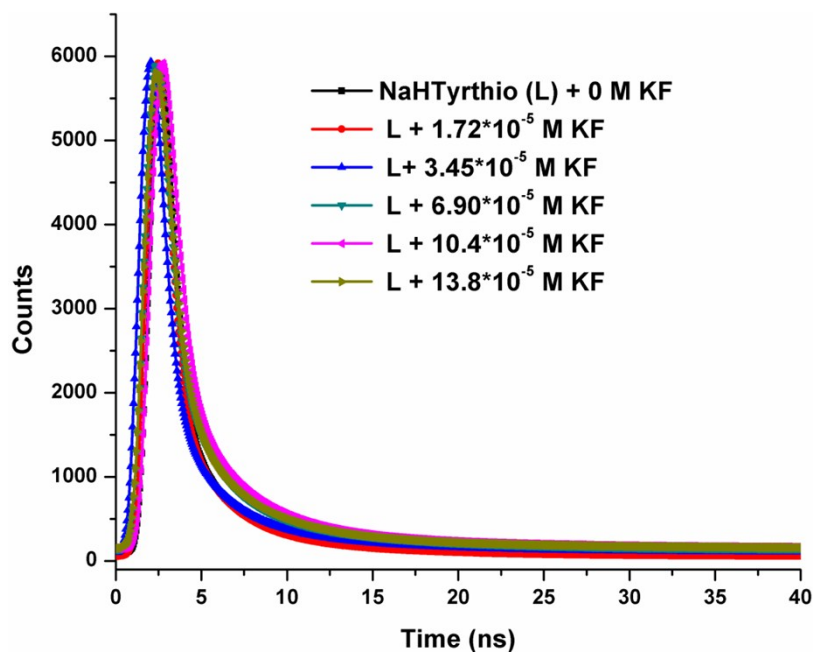

**Fig. S17** Lifetime decay profiles of NaHTyrthio (3 mL, 0.72 mM/methanol) in presence of various concentrations of F<sup>-</sup> ( $\lambda_{\text{exc}} = 370$  nm, monitored at 465 nm).

a)

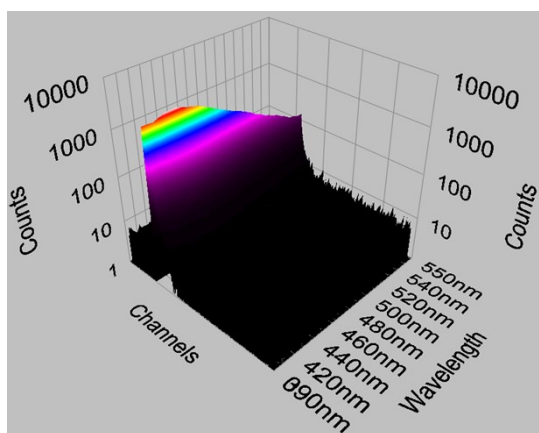

b)

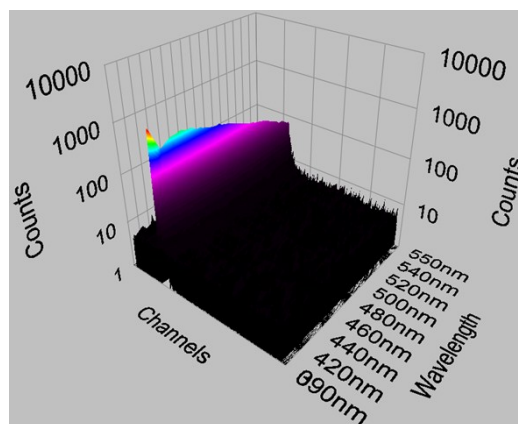

**Fig. S18** Time resolved spectra of NaHTyrthio in a) absence of F<sup>-</sup> and b) presence of F<sup>-</sup> ( $\lambda_{\text{exc}} = 370$  nm).

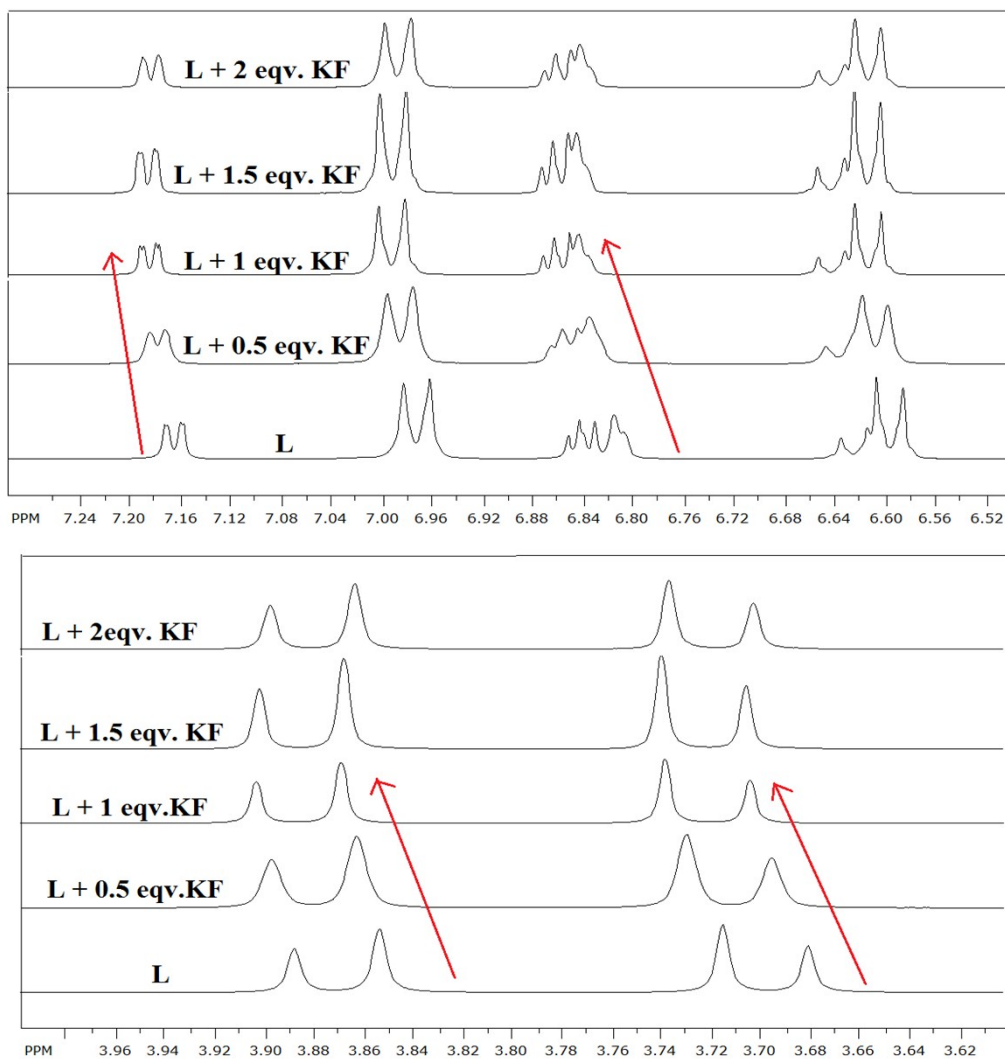

**Fig. S19**  $^1\text{H}$  NMR titrimetry of NaHTyrthio (L) with KF as an analyte: (a) effect on the thiophene protons (top) and (b) effect on the diastereomeric methylene protons (bottom).

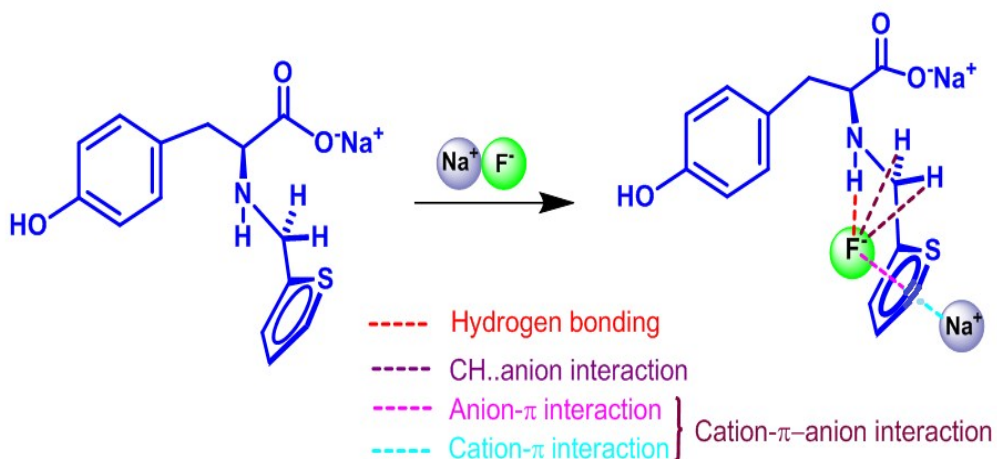

**Scheme S1.** Schematic representation of various interactions between sensor [NaHTyrthio (L)] and analyte [NaF].

**Table S1.** Standard deviation for probe/sensor NaHTyrthio.

| Blank Reading (Only sensor, NaHTyrthio) | Fluorescence intensity |
|-----------------------------------------|------------------------|
| Reading 1                               | 559.317                |
| Reading 2                               | 560.224                |
| Reading 3                               | 557.213                |
| Standard Deviation ( $\sigma$ )         | 1.544646               |

**Table S2.** Detection limit for NaHTyrthio in case of  $\text{Cu}^{2+}$  as an analyte.

|                                 |         |                    |
|---------------------------------|---------|--------------------|
| Slope from graph (m)            | -5.9398 | $\mu\text{M}^{-1}$ |
| Detection limit ( $3\sigma/m$ ) | 0.78    | $\mu\text{M}$      |
| Limit of detection (LOD)        | 49.54   | ppb                |

**Table S3.** Thermodynamic parameters for interaction between NaHTyrthio (5 mM) and  $\text{Cu}^{2+}$  (0.5 mM) in methanol at 25 °C.

| Sequential binding Mode (binding Sites per molecule: 3) | K ( $\text{M}^{-1}$ ) | $\Delta\text{H}$ (kcal/mol) | $\Delta\text{S}$ (cal/mol/deg) | $\Delta\text{S}$ (kcal/mol/deg) | T (Kelvin) | T $\Delta\text{S}$ (Kcal/mol) | $\Delta\text{G} = \Delta\text{H} - \text{T}\Delta\text{S}$ (kcal/mol) |
|---------------------------------------------------------|-----------------------|-----------------------------|--------------------------------|---------------------------------|------------|-------------------------------|-----------------------------------------------------------------------|
| 1 <sup>st</sup> site                                    | 1.59E5                | -7.7                        | -2.11                          | -0.00211                        | 298        | -0.62878                      | -7.07122                                                              |
| 2 <sup>nd</sup> site                                    | 3.62E3                | 98.7                        | 347                            | 0.347                           | 298        | 103.406                       | -4.706                                                                |
| 3 <sup>rd</sup> site                                    | 6.41E4                | -109.9                      | -346                           | -0.346                          | 298        | -103.108                      | -6.792                                                                |

$$\text{Total } \Delta\text{G} = \Delta\text{G}_1 + \Delta\text{G}_2 + \Delta\text{G}_3 = (-7.07122) + (-4.706) + (-6.792) = -18.5692 \text{ kcal/mol}$$

**Table S4.** Standard deviation for probe/sensor NaHTyrthio.

| Blank Reading (Only sensor, NaHTyrthio) | Fluorescence intensity |
|-----------------------------------------|------------------------|
| Reading 1                               | 376.50                 |
| Reading 2                               | 372.23                 |
| Reading 3                               | 377.67                 |
| Standard Deviation ( $\sigma$ )         | 2.86343                |

**Table S5.** Detection limit for NaHTyrthio in case of nitrobenzene as an analyte.

|                                 |         |                    |
|---------------------------------|---------|--------------------|
| Slope from graph (m)            | -2.3221 | $\mu\text{M}^{-1}$ |
| Detection limit ( $3\sigma/m$ ) | 3.70    | $\mu\text{M}$      |
| Limit of detection (LOD)        | 455     | ppb                |

**Table S6.** Fluorescence decay parameters of the NaHTyrthio in methanol at 315 nm ( $\lambda_{\text{exc}} = 280$  nm) in the presence of different amounts of nitrobenzene<sup>a</sup>

| Sr. No. | [NB] * $10^{-5}$ M | A <sub>1</sub> (%) | A <sub>2</sub> (%) | $\tau_1$ (ns) | $\tau_2$ (ns) | $\langle \tau \rangle$ (ns) <sup>b</sup> |
|---------|--------------------|--------------------|--------------------|---------------|---------------|------------------------------------------|
| 1       | 0                  | 77                 | 23                 | 1.37          | 3.79          | 1.93                                     |
| 2       | 1.72               | 77                 | 23                 | 1.36          | 3.81          | 1.93                                     |
| 3       | 3.45               | 77                 | 23                 | 1.34          | 3.80          | 1.89                                     |
| 4       | 6.90               | 79                 | 21                 | 1.30          | 3.80          | 1.86                                     |
| 5       | 10.40              | 78                 | 22                 | 1.29          | 3.74          | 1.86                                     |
| 6       | 13.80              | 78                 | 22                 | 1.31          | 3.74          | 1.87                                     |
| 7       | 17.30              | 78                 | 22                 | 1.31          | 3.68          | 1.88                                     |

<sup>a</sup>Determined from  $I = A_1 \exp(-t/\tau_1) + A_2 \exp(-t/\tau_2)$ , where A and  $\tau$  are the fractional amount and fluorescence lifetime of the shorter (1)- and longer(2)-lived species, respectively; concentration of NaHTyrthio: 0.72 mM. <sup>b</sup>Weighted mean lifetime determined from  $\langle \tau \rangle = (A_1\tau_1 + A_2\tau_2)/(A_1 + A_2)$ .

**Table S7.** Standard deviation for probe/sensor NaHTyrthio.

| Blank Reading (Only sensor, NaHTyrthio) | Fluorescence intensity |
|-----------------------------------------|------------------------|
| Reading 1                               | 13.146                 |
| Reading 2                               | 13.904                 |
| Reading 3                               | 12.464                 |
| Standard Deviation ( $\sigma$ )         | 0.720334               |

**Table S8.** Detection limit for NaHTyrthio in case of F<sup>-</sup> as an analyte(in methanol)

|                                 |          |                  |
|---------------------------------|----------|------------------|
| Slope from graph (m)            | -0.27856 | $\text{mM}^{-1}$ |
| Detection limit ( $3\sigma/m$ ) | 7.76     | mM               |
| Limit of detection (LOD)        | 148      | ppm              |

**Table S9.** Effect of solvent and counter cation on the detection limits of ligand for analyte F<sup>-</sup>.

| Ligand                  | analyte | solvent  | Detection limit |                         |
|-------------------------|---------|----------|-----------------|-------------------------|
| NaHtyrothio             | NaF     | DMSO     | 13.8 ppm        | 3.3*10 <sup>-4</sup> M  |
| NaHtyrothio             | NaF     | Methanol | 21 ppm          | 5.0*10 <sup>-4</sup> M  |
| NaHtyrothio             | KF      | DMSO     | 17 ppm          | 2.9*10 <sup>-4</sup> M  |
| NaHtyrothio             | KF      | Methanol | 148 ppm         | 2.5*10 <sup>-3</sup> M  |
| LiHtyrothio             | KF      | Methanol | 81 ppm          | 1.39*10 <sup>-3</sup> M |
| LiHtyrothio             | KF      | DMSO     | 41 ppm          | 7.07*10 <sup>-4</sup> M |
| KHtyrothio              | KF      | DMSO     | 15.3 ppm        | 2.62*10 <sup>-4</sup> M |
| H <sub>2</sub> tyrothio | KF      | DMSO     | 85 ppm          | 1.46*10 <sup>-3</sup> M |

**Table S10.** Standard deviation for probe/sensor NaHTyrthio.

| Blank Reading (Only sensor, NaHTyrthio) | Fluorescence intensity |
|-----------------------------------------|------------------------|
| Reading 1                               | 15.478                 |
| Reading 2                               | 15.654                 |
| Reading 3                               | 15.205                 |
| Standard Deviation (σ)                  | 0.22624                |

**Table S11.** Detection limit for NaHTyrthio in case of F<sup>-</sup> as an analyte (in DMSO)

|                          |          |                  |
|--------------------------|----------|------------------|
| Slope from graph (m)     | -0.93544 | mM <sup>-1</sup> |
| Detection limit (3σ/m)   | 0.725    | mM               |
| Limit of detection (LOD) | 13.8     | ppm              |

**Table S12.** Fluorescence decay parameters of the NaHTyrthio in methanol at 465 nm ( $\lambda_{exc} = 370$  nm) in the presence of different amounts of F<sup>-a</sup>

| Sr. No. | [F <sup>-</sup> ] * 10 <sup>-5</sup> M | A <sub>1</sub> (%) | A <sub>2</sub> (%) | A <sub>3</sub> (%) | $\tau_1$ (ns) | $\tau_2$ (ns) | $\tau_3$ (ns) | $\langle \tau \rangle$ (ns) <sup>b</sup> |
|---------|----------------------------------------|--------------------|--------------------|--------------------|---------------|---------------|---------------|------------------------------------------|
| 1       | 0                                      | 11                 | 02                 | 87                 | 2.23          | 7.97          | 0.34          | 0.70                                     |
| 2       | 1.72                                   | 11                 | 02                 | 87                 | 2.35          | 7.77          | 0.38          | 0.75                                     |
| 3       | 3.45                                   | 13                 | 02                 | 85                 | 2.53          | 8.42          | 0.46          | 0.77                                     |
| 4       | 6.90                                   | 17                 | 04                 | 79                 | 2.31          | 7.93          | 0.50          | 1.10                                     |
| 5       | 10.40                                  | 17                 | 02                 | 81                 | 3.09          | 10.15         | 0.62          | 1.23                                     |
| 6       | 13.80                                  | 16                 | 02                 | 81                 | 3.31          | 11.19         | 0.67          | 1.30                                     |

<sup>a</sup>Determined from  $I = A_1 \exp(-t/\tau_1) + A_2 \exp(-t/\tau_2)$ , where A and  $\tau$  are the fractional amount and fluorescence lifetime of varied species,; concentration of NaHTyrthio: 0.72 mM. <sup>b</sup>Weighted mean lifetime determined from  $\langle \tau \rangle = (A_1\tau_1 + A_2\tau_2 + A_3\tau_3)/(A_1 + A_2 + A_3)$ .
